# Supplementary material
Source: PubMed Central journal article supplement (PMC3148294)
Supplement: NIHMS309519-supplement-01.pdf [file NIHMS309519-supplement-01.pdf]

## Supplemental Table 1. Observations of reagents tested during co-culture optimization

|                       | Variables Tested                                                                           | Observations                                                                                                                                                                                                                                                                                                                    | Final Selected                                                                                                                                         |
|-----------------------|--------------------------------------------------------------------------------------------|---------------------------------------------------------------------------------------------------------------------------------------------------------------------------------------------------------------------------------------------------------------------------------------------------------------------------------|--------------------------------------------------------------------------------------------------------------------------------------------------------|
| Matrix                | Matrigel (1.50)                                                                            | Cells from embryonically and postnatally sourced tissue adhere well, but thick substrate makes imaging and assessing the development of neurons difficult                                                                                                                                                                       | Not used                                                                                                                                               |
|                       | Poly-d-lysine (100µg/ml)                                                                   | Cells from both sources adhere well but develop slowly                                                                                                                                                                                                                                                                          | Not used                                                                                                                                               |
|                       | Poly-d-lysine (100µg/ml) and Laminin (4µg/ml)                                              | Cells adhere as well as in higher laminin concentration and develop faster than PDL alone. Develop in near mono-layer, able to image neurons easily                                                                                                                                                                             | Selected as final matrix due to good adherence, survival, development, and imaging                                                                     |
| Cell Source           | P1-3 striatum dissected from coronal slice                                                 | Initial cell numbers are high, but cultures fail to survive to three weeks <i>in vitro</i>                                                                                                                                                                                                                                      | Not used                                                                                                                                               |
|                       | E16 "striatum" dissected as whole ganglionic eminence                                      | This technique provides a large number of cells that survive well in culture, but also contributes more non-MSNs than the postnatal source                                                                                                                                                                                      | Despite the increase in non-MSN cells from this source, it consistently produces MSNs that can survive past three weeks in culture                     |
| Cell Density          | 1*10 <sup>6</sup> cells/35mm dish                                                          | This density was used in attempt to overcome the failure of postnatal tissue to survive <i>in vitro</i> . In embryonically sourced tissue, this density was far too high for imaging.                                                                                                                                           | Not used                                                                                                                                               |
|                       | 2*10 <sup>5</sup> cells/35mm dish                                                          | In cultures from postnatal tissue this density was initially promising, but cultures failed to survive to three weeks in culture. In embryonically sourced tissue this density gave sufficient for good MSN survival and ease of imaging.                                                                                       | This density, in a 2:3 striatum to cortex ratio, produces embryonic cultures that survive past three weeks in culture with high numbers of mature MSNs |
| Media                 | Glial Conditioned Neurobasal Growth Media                                                  | Despite the presence of glia in the cultures, the conditioning of growth media on confluent glial plates improved the survival and development of cultures above unconditioned media.                                                                                                                                           | All cultures are maintained in glial conditioned growth media that is supplemented weekly                                                              |
| Supplements           | BDNF                                                                                       | The addition of BDNF to glial conditioned growth media did not improve survival or development of MSNs                                                                                                                                                                                                                          | Not used                                                                                                                                               |
|                       | Anti-mitotic agents (67.5µm 5-Fluoro-2'-deoxyuridine and 137µm uridine at 3, 7, and 14div) | Although anti-mitotic agents reduced the number of proliferating glia in the cultures they produced a pronounced loss of neurons that were associated with the glial cells. The addition of glial conditioned media did not augment this effect, indicating that the presence of glia may be helping MSNs to survive in culture | Not used                                                                                                                                               |
|                       | Antibiotics                                                                                | Antibiotics are not needed in cultures sourced from embryonic tissue but required to reduce contamination seen in postnatally sourced tissue.                                                                                                                                                                                   | Not used                                                                                                                                               |
| Digestion Solution    | Papain Digestion                                                                           | Digested cells well, produced cells that were easily dissociated manually                                                                                                                                                                                                                                                       | Not used                                                                                                                                               |
|                       | Trypsin Digestion                                                                          | Digested cells well, produced cells that were easily dissociated manually                                                                                                                                                                                                                                                       | Although both digestion techniques worked well, trypsin digestion was already in routine use and was selected for future experiments                   |
| Transduction          | Calcium Phosphate                                                                          | Effective at transducing the cortical pyramidal neurons but failed to transduce MSNs                                                                                                                                                                                                                                            | Not used                                                                                                                                               |
|                       | Adeno-virus                                                                                | Infected the high levels of glia in the culture with greater efficiency than neurons and non-MSNs with greater efficiency than neurons                                                                                                                                                                                          | Not used                                                                                                                                               |
|                       | Electroporation (AMAXA)                                                                    | Effective in transducing ~10-20% of MSNs in mature culture when introduced at plating. Electroporation of striatal cells in culture precludes transduction of pyramidal neurons.                                                                                                                                                | Only effective method at consistently transducing an appreciable number of MSNs in culture.                                                            |
| Coverslip Preparation | German Glass (ex. Bellco)                                                                  | Improves adherence and survival after 5div                                                                                                                                                                                                                                                                                      | Used                                                                                                                                                   |
|                       | Acid and Ethanol washing                                                                   | Reduces fasciculation of neurites during development. Nitric acid can also be used, but is more difficult to dispose of                                                                                                                                                                                                         | Used                                                                                                                                                   |
|                       | Maintained in 200°C oven                                                                   | Eliminates seasonal air quality differences that impact cell adherence                                                                                                                                                                                                                                                          | Used                                                                                                                                                   |
